# Supplementary material for: Intrusion–extrusion spring performance of –COK-14 zeolite enhanced by structural changes
Source: Royal Society of Chemistry journal article supplement (doi:10.1039/c6cp03162e), 2016-01-01
Supplement: c6cp03162e1.pdf [file c6cp03162e1.pdf]

## Intrusion-extrusion spring performance of –COK-14 zeolite enhanced by structural change

Christine E.A Kirschhock<sup>a\*</sup>, Michiel De Prins<sup>a</sup>, Elke Verheijen<sup>a</sup>, Andrey Ryzhikov<sup>b</sup>, T. Jean Daou<sup>b</sup>, Habiba Nouali<sup>b</sup>, Francis Taulelle<sup>a</sup>, Johan A. Martens<sup>a</sup> and Joël. Patarin<sup>b\*</sup>

<sup>a</sup> Center for Surface Chemistry and Catalysis, KU Leuven, Celestijnenlaan 200f - box 2461  
3001 Leuven, Belgium,

<sup>b</sup> Université de Strasbourg (UDS), Université de Haute Alsace (UHA), Equipe Matériaux à Porosité Contrôlée (MPC), Institut de Science des Matériaux de Mulhouse (IS2M), UMR CNRS 7361, 3 bis rue Alfred Werner, F-68093 Mulhouse, France.

### Supplementary information

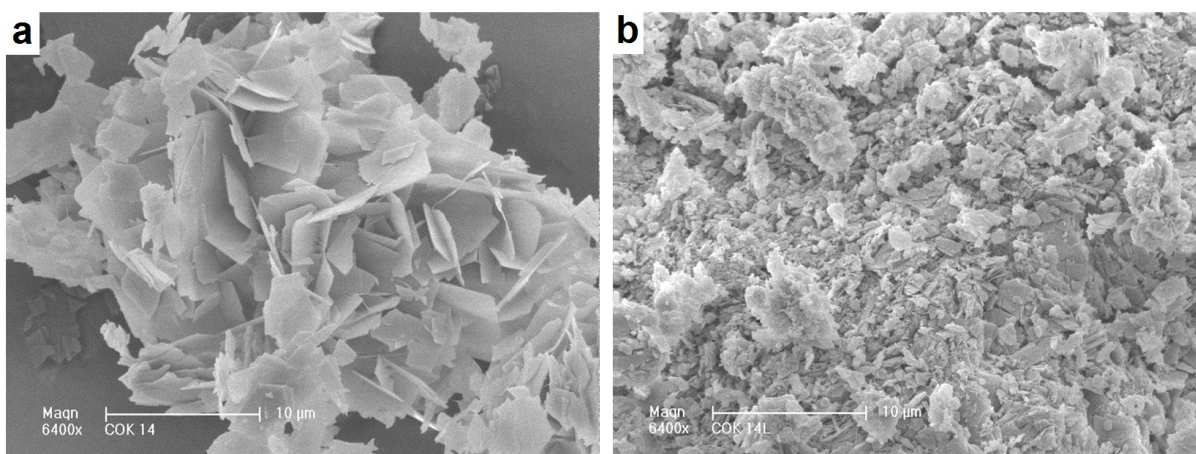

Figure S1. SEM micrographs of the –COK-14 samples before (a) and after intrusion–extrusion experiments with 20M LiCl aqueous solution (b).

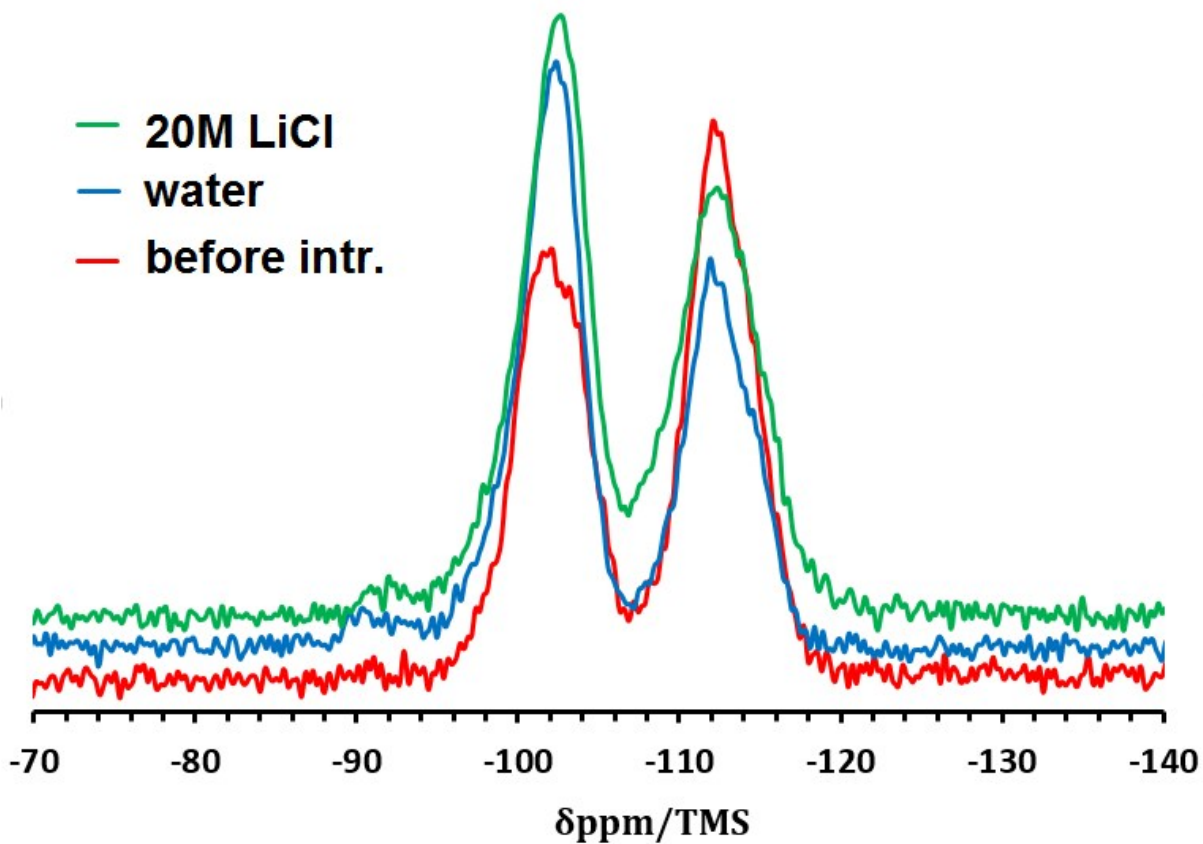

Figure S2.  $^1\text{H}$ - $^{29}\text{Si}$  CP MAS NMR spectra of the -COK-14 samples before and after intrusion-extrusion experiments with water and 20 M LiCl aqueous solutions.

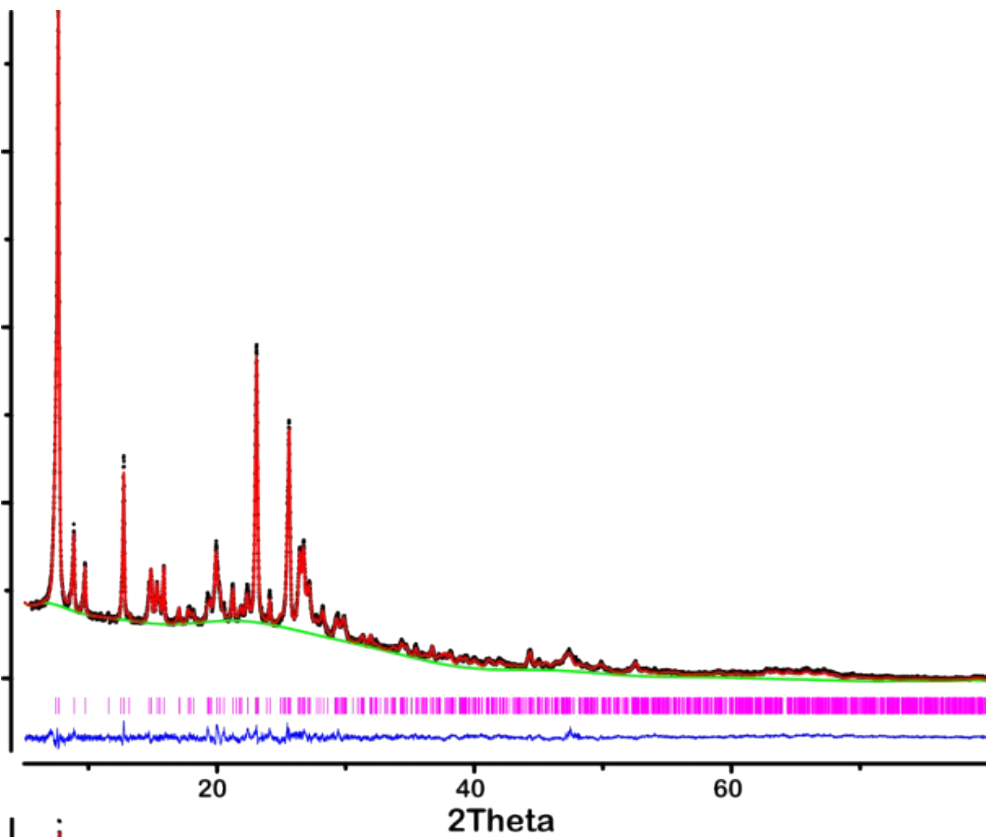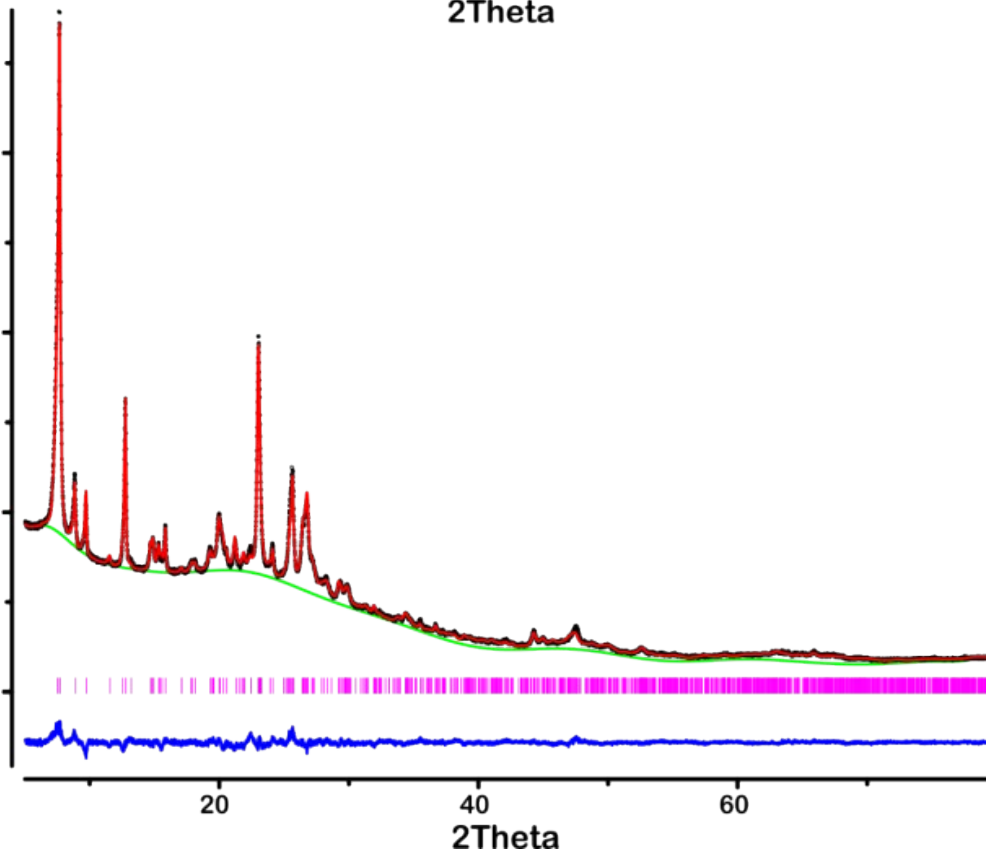

Figure S3. Refined powder patterns of -COK-14, intruded with water (top) and LiCl (bottom). Experimental (black) and calculated (red) XRD patterns as well as the difference profile are shown (blue). The short tick marks below the patterns give the positions of the Bragg reflections.

## Water intruded sample, refined structural parameters

Table S1

| substructure 1 corresponding to non-intruded –COK-14 |            |            |            |           |           |       | substructure 2 with structural break between Sib6 and Sib5 |            |            |             |           |           |       |
|------------------------------------------------------|------------|------------|------------|-----------|-----------|-------|------------------------------------------------------------|------------|------------|-------------|-----------|-----------|-------|
| atom                                                 | x          | y          | z          | uiso      | occ.      | mult. | atom                                                       | x          | y          | z           | uiso      | occ.      | mult. |
| Si3                                                  | 0.3154(11) | 0.7867(11) | 0.2787(19) | 0.555(17) | 0.031(12) | 8     | Sib3                                                       | 0.3093(9)  | 0.7960(13) | 0.2281(17)  | 0.445(17) | 0.043(9)  | 8     |
| Si4                                                  | 0.3140(5)  | 0.7929(10) | 0.5139(16) | 0.555(17) | 0.031(12) | 8     | Sib4                                                       | 0.3126(6)  | 0.7902(11) | 0.4940(17)  | 0.445(17) | 0.043(9)  | 8     |
| Si5                                                  | 0.3118(10) | 0.7930(11) | 0.8736(19) | 0.555(17) | 0.031(12) | 8     | Sib5                                                       | 0.3113(13) | 0.7922(12) | 0.8452(12)  | 0.445(17) | 0.043(9)  | 8     |
| Si6                                                  | 0.3626(11) | 0.7084(12) | 0.0952(19) | 0.555(17) | 0.031(12) | 8     | Sib6                                                       | 0.8890(11) | 0.8531(14) | 0.1702(22)  | 0.392(14) | 0.043(9)  | 8     |
| Si7                                                  | 0.3910(9)  | 0.7047(11) | 0.7525(17) | 0.555(17) | 0.031(12) | 8     | Sib7                                                       | 0.3711(9)  | 0.7006(12) | 0.7042(19)  | 0.445(17) | 0.043(9)  | 8     |
| Si8                                                  | 0.2874(16) | 0          | 0.8049(13) | 0.555(17) | 0.031(12) | 4     | Sib8                                                       | 0.2693(16) | 0          | 0.8039(17)  | 0.445(17) | 0.043(9)  | 4     |
| Si9                                                  | 0.2301(15) | 0.5        | 0.7907(16) | 0.555(17) | 0.031(12) | 4     | Sib9                                                       | 0.2151(12) | 0.5        | 0.8313(17)  | 0.445(17) | 0.043(9)  | 4     |
| Si10                                                 | 0.3341(12) | 0.5        | 0.6830(10) | 0.555(17) | 0.031(12) | 4     | Sib10                                                      | 0.3053(13) | 0.5        | 0.6886(18)  | 0.445(17) | 0.043(9)  | 4     |
| Si11                                                 | 0.2294(13) | 0.5        | 0.4693(12) | 0.555(17) | 0.031(12) | 4     | Sib11                                                      | 0.2093(13) | 0.5        | 0.4447(15)  | 0.445(17) | 0.043(9)  | 4     |
| Si12                                                 | 0.3022(15) | 0.5        | 0.0593(17) | 0.555(17) | 0.031(12) | 4     | Sib12                                                      | 0.3073(14) | 0.5        | 0.0738(14)  | 0.445(17) | 0.043(9)  | 4     |
| Si13                                                 | 0.9870(8)  | 0.7127(10) | 0.1158(15) | 0.536(12) | 0.031(12) | 8     | Sib13                                                      | 1.0106(9)  | 0.8870(14) | 0.1392(10)  | 0.445(17) | 0.043(9)  | 8     |
| O1                                                   | 0.3080(16) | 0.9030(7)  | 0.2601(19) | 0.555(17) | 0.051(8)  | 8     | Ob1                                                        | 0.3264(11) | 0.9072(7)  | 0.2135(17)  | 0.445(17) | 0.064(12) | 8     |
| O2                                                   | 0.3624(10) | 0.7412(16) | 0.2237(10) | 0.555(17) | 0.051(8)  | 8     | Ob2                                                        | 0.3563(12) | 0.7472(14) | 0.1771(13)  | 0.445(17) | 0.064(12) | 8     |
| O3                                                   | 0.3395(9)  | 0.7562(19) | 0.4152(16) | 0.555(17) | 0.051(8)  | 8     | Ob3                                                        | 0.3155(12) | 0.7802(18) | 0.3624(17)  | 0.445(17) | 0.064(12) | 8     |
| O4                                                   | 0.2516(14) | 0.7359(14) | 0.2198(13) | 0.555(17) | 0.051(8)  | 8     | Ob4                                                        | 0.2424(10) | 0.7744(11) | 0.1472(16)  | 0.445(17) | 0.064(12) | 8     |
| O5                                                   | 0.3035(12) | 0.9076(6)  | 0.4992(15) | 0.555(17) | 0.051(8)  | 8     | Ob5                                                        | 0.3244(12) | 0.9016(7)  | 0.5413(15)  | 0.445(17) | 0.064(12) | 8     |
| O6                                                   | 0.25       | 0.75       | 0.5        | 0.555(17) | 0.051(8)  | 4     | Ob6                                                        | 0.25       | 0.75       | 0.5         | 0.445(17) | 0.064(12) | 4     |
| O7                                                   | 0.3617(7)  | 0.7730(17) | 0.6407(17) | 0.555(17) | 0.051(8)  | 8     | Ob7                                                        | 0.3666(7)  | 0.7209(18) | 0.5710(18)  | 0.445(17) | 0.064(12) | 8     |
| O8                                                   | 0.3121(12) | 0.7758(19) | 0.0048(12) | 0.555(17) | 0.051(8)  | 8     | Ob81                                                       | 0.3711(10) | 0.7550(19) | -0.0335(16) | 0.445(17) | 0.064(12) | 8     |
|                                                      |            |            |            |           |           |       | Ob82                                                       | 0.8985(17) | 0.9048(7)  | 0.2945(11)  | 0.392(14) | 0.064(12) | 8     |
| O9                                                   | 0.3265(14) | 0.9046(7)  | 0.8564(16) | 0.555(17) | 0.051(8)  | 8     | Ob9                                                        | 0.3017(16) | 0.9035(7)  | 0.8714(14)  | 0.445(17) | 0.064(12) | 8     |
| O10                                                  | 0.3627(16) | 0.7269(10) | 0.8531(12) | 0.555(17) | 0.051(8)  | 8     | Ob10                                                       | 0.3233(8)  | 0.7758(17) | 0.7237(10)  | 0.445(17) | 0.064(12) | 8     |
| O11                                                  | 0.3426(16) | 0.5959(7)  | 0.072(4)   | 0.555(17) | 0.051(8)  | 8     | Ob11                                                       | 0.3437(14) | 0.5941(7)  | 0.0584(21)  | 0.445(17) | 0.064(12) | 8     |
| O13                                                  | 0.3758(12) | 0.5944(7)  | 0.7109(17) | 0.555(17) | 0.051(8)  | 8     | Ob13                                                       | 0.3448(14) | 0.5955(7)  | 0.7183(16)  | 0.445(17) | 0.064(12) | 8     |
| O14                                                  | 0.2286(18) | 0          | 0.8398(11) | 0.555(17) | 0.051(8)  | 4     | Ob14                                                       | 0.2021(16) | 0          | 0.8001(15)  | 0.445(17) | 0.064(12) | 4     |
| O15                                                  | 0.2747(18) | 0          | 0.6664(12) | 0.555(17) | 0.051(8)  | 4     | Ob15                                                       | 0.2760(19) | 0          | 0.6761(17)  | 0.445(17) | 0.064(12) | 4     |
| O16                                                  | 0.2507(11) | 0.5        | 0.9328(15) | 0.555(17) | 0.051(8)  | 4     | Ob16                                                       | 0.2446(16) | 0.5        | 0.9708(18)  | 0.445(17) | 0.064(12) | 4     |
| O17                                                  | 0.2889(20) | 0.5        | 0.755(5)   | 0.555(17) | 0.051(8)  | 4     | Ob17                                                       | 0.2626(11) | 0.5        | 0.765(5)    | 0.445(17) | 0.064(12) | 4     |
| O18                                                  | 0.2980(14) | 0.5        | 0.5452(12) | 0.555(17) | 0.051(8)  | 4     | Ob18                                                       | 0.2707(17) | 0.5        | 0.5510(10)  | 0.445(17) | 0.064(12) | 4     |
| O19                                                  | 0.0389(8)  | 0.7835(14) | 0.1925(19) | 0.555(17) | 0.051(8)  | 8     | Ob19                                                       | 0.0629(10) | 0.8108(10) | 0.2058(17)  | 0.445(17) | 0.064(12) | 8     |
| O31                                                  | 0.9840(12) | 0.6176(14) | 0.1928(11) | 0.555(17) | 0.051(8)  | 8     | Ob20                                                       | 0.5184(12) | 0.5        | 0.185(5)    | 0.445(17) | 0.064(12) | 4     |
| O21                                                  | 0.9253(7)  | 0.7710(18) | 0.0814(16) | 0.555(17) | 0.051(8)  | 8     | Ob21                                                       | 0.9507(9)  | 0.8392(17) | 0.1504(13)  | 0.445(17) | 0.064(12) | 8     |
| O22                                                  | 0          | 0.678(4)   | 0          | 0.536(12) | 0.051(8)  | 4     | Ob22                                                       | 0          | 0.887(5)   | 0           | 0.445(17) | 0.064(12) | 4     |

## LiCl intruded sample, refined structural parameters

Table S2

| substructure 1 corresponding to non-intruded –COK-14 |             |            |             |           |           |       | substructure 2 with structural break between Sib6 and Sib5 |             |            |            |           |           |       |
|------------------------------------------------------|-------------|------------|-------------|-----------|-----------|-------|------------------------------------------------------------|-------------|------------|------------|-----------|-----------|-------|
| atom                                                 | x           | y          | z           | uiso      | occ.      | mult. | atom                                                       | x           | y          | z          | uiso      | occ.      | mult. |
| Si3                                                  | 0.3027(8)   | 0.7851(6)  | 0.2872(9)   | 0.373(12) | 0.038(21) | 8     | Sib3                                                       | 0.3087(7)   | 0.7924(7)  | 0.2331(11) | 0.627(12) | 0.078(8)  | 8     |
| Si4                                                  | 0.31442(30) | 0.7922(6)  | 0.5156(9)   | 0.373(12) | 0.038(21) | 8     | Sib4                                                       | 0.31286(32) | 0.7888(6)  | 0.4941(10) | 0.627(12) | 0.078(8)  | 8     |
| Si5                                                  | 0.3216(6)   | 0.7903(7)  | 0.8609(12)  | 0.373(12) | 0.038(21) | 8     | Sib5                                                       | 0.3169(7)   | 0.7922(7)  | 0.8763(16) | 0.627(12) | 0.078(8)  | 8     |
| Si6                                                  | 0.3504(7)   | 0.7087(7)  | 0.0880(12)  | 0.373(12) | 0.038(21) | 8     | Sib6                                                       | 0.8775(9)   | 0.8566(8)  | 0.1649(16) | 0.408(13) | 0.078(8)  | 8     |
| Si7                                                  | 0.3975(6)   | 0.7064(7)  | 0.7508(10)  | 0.373(12) | 0.038(21) | 8     | Sib7                                                       | 0.3816(7)   | 0.7001(7)  | 0.7233(13) | 0.627(12) | 0.078(8)  | 8     |
| Si8                                                  | 0.2972(12)  | 0          | 0.8033(16)  | 0.373(12) | 0.038(21) | 4     | Sib8                                                       | 0.2719(10)  | 0          | 0.8031(17) | 0.627(12) | 0.078(8)  | 4     |
| Si9                                                  | 0.2351(11)  | 0.5        | 0.7841(15)  | 0.373(12) | 0.038(21) | 4     | Sib9                                                       | 0.2167(7)   | 0.5        | 0.8252(17) | 0.627(12) | 0.078(8)  | 4     |
| Si10                                                 | 0.3388(8)   | 0.5        | 0.6871(13)  | 0.373(12) | 0.038(21) | 4     | Sib10                                                      | 0.3122(8)   | 0.5        | 0.6971(11) | 0.627(12) | 0.078(8)  | 4     |
| Si11                                                 | 0.2275(8)   | 0.5        | 0.4736(13)  | 0.373(12) | 0.038(21) | 4     | Sib11                                                      | 0.2137(8)   | 0.5        | 0.4530(15) | 0.627(12) | 0.078(8)  | 4     |
| Si12                                                 | 0.2893(10)  | 0.5        | 0.0503(16)  | 0.373(12) | 0.038(21) | 4     | Sib12                                                      | 0.2973(8)   | 0.5        | 0.0664(15) | 0.627(12) | 0.078(8)  | 4     |
| Si13                                                 | 0.9816(5)   | 0.7278(20) | 0.1163(8)   | 0.315(10) | 0.038(21) | 8     | Sib13                                                      | 1.0035(7)   | 0.8923(9)  | 0.1362(7)  | 0.627(12) | 0.078(8)  | 8     |
| O1                                                   | 0.2994(12)  | 0.9031(4)  | 0.2794(15)  | 0.373(12) | 0.057(19) | 8     | Ob1                                                        | 0.3228(8)   | 0.9072(4)  | 0.2333(15) | 0.627(12) | 0.082(10) | 8     |
| O2                                                   | 0.3393(15)  | 0.7448(16) | 0.2060(17)  | 0.373(12) | 0.057(19) | 8     | Ob2                                                        | 0.3554(10)  | 0.7527(7)  | 0.1744(17) | 0.627(12) | 0.082(10) | 8     |
| O3                                                   | 0.3389(5)   | 0.7472(10) | 0.4181(9)   | 0.373(12) | 0.057(19) | 8     | Ob3                                                        | 0.3186(8)   | 0.7637(14) | 0.3672(11) | 0.627(12) | 0.082(10) | 8     |
| O4                                                   | 0.2364(9)   | 0.7415(18) | 0.2459(19)  | 0.373(12) | 0.057(19) | 8     | Ob4                                                        | 0.2414(8)   | 0.7727(13) | 0.1534(19) | 0.627(12) | 0.082(10) | 8     |
| O5                                                   | 0.3049(8)   | 0.9071(4)  | 0.4935(14)  | 0.373(12) | 0.057(19) | 8     | Ob5                                                        | 0.3206(7)   | 0.9032(4)  | 0.5284(19) | 0.627(12) | 0.082(10) | 8     |
| O6                                                   | 0.25        | 0.75       | 0.5         | 0.373(12) | 0.057(19) | 4     | Ob6                                                        | 0.25        | 0.75       | 0.5        | 0.627(12) | 0.082(10) | 4     |
| O7                                                   | 0.3599(5)   | 0.7764(10) | 0.6453(9)   | 0.373(12) | 0.057(19) | 8     | Ob7                                                        | 0.3671(4)   | 0.7315(12) | 0.5890(13) | 0.627(12) | 0.082(10) | 8     |
| O8                                                   | 0.3084(8)   | 0.7748(13) | -0.0176(17) | 0.373(12) | 0.057(19) | 8     | Ob81                                                       | 0.3618(11)  | 0.7611(10) | 0.0129(18) | 0.627(12) | 0.082(10) | 8     |
|                                                      |             |            |             |           |           |       | Ob82                                                       | 0.8789(14)  | 0.9049(4)  | 0.2870(18) | 0.408(13) | 0.082(10) | 8     |
| O9                                                   | 0.3366(11)  | 0.9040(4)  | 0.8503(19)  | 0.373(12) | 0.057(19) | 8     | Ob9                                                        | 0.3025(9)   | 0.9054(4)  | 0.8781(19) | 0.627(12) | 0.082(10) | 8     |
| O10                                                  | 0.3789(10)  | 0.7270(15) | 0.8651(13)  | 0.373(12) | 0.057(19) | 8     | Ob10                                                       | 0.3534(13)  | 0.7780(10) | 0.7887(14) | 0.627(12) | 0.082(10) | 8     |
| O11                                                  | 0.3302(11)  | 0.5959(4)  | 0.0648(14)  | 0.373(12) | 0.057(19) | 8     | Ob11                                                       | 0.3316(9)   | 0.5963(4)  | 0.0490(18) | 0.627(12) | 0.082(10) | 8     |
| O13                                                  | 0.3803(8)   | 0.5953(4)  | 0.7095(12)  | 0.373(12) | 0.057(19) | 8     | Ob13                                                       | 0.3529(8)   | 0.5956(4)  | 0.7289(17) | 0.627(12) | 0.082(10) | 8     |
| O14                                                  | 0.2419(14)  | 0          | 0.8501(10)  | 0.373(12) | 0.057(19) | 4     | Ob14                                                       | 0.2048(10)  | 0          | 0.8020(14) | 0.627(12) | 0.082(10) | 4     |
| O15                                                  | 0.2773(13)  | 0          | 0.6624(15)  | 0.373(12) | 0.057(19) | 4     | Ob15                                                       | 0.2760(15)  | 0          | 0.6726(11) | 0.627(12) | 0.082(10) | 4     |
| O16                                                  | 0.2404(14)  | 0.5        | 0.9210(15)  | 0.373(12) | 0.057(19) | 4     | Ob16                                                       | 0.2338(10)  | 0.5        | 0.9654(16) | 0.627(12) | 0.082(10) | 4     |
| O17                                                  | 0.3003(13)  | 0.5        | 0.7736(19)  | 0.373(12) | 0.057(19) | 4     | Ob17                                                       | 0.2725(12)  | 0.5        | 0.7807(33) | 0.627(12) | 0.082(10) | 4     |
| O18                                                  | 0.2962(8)   | 0.5        | 0.5529(14)  | 0.373(12) | 0.057(19) | 4     | Ob18                                                       | 0.2756(10)  | 0.5        | 0.5598(13) | 0.627(12) | 0.082(10) | 4     |
| O19                                                  | 0.0329(5)   | 0.7779(17) | 0.2234(14)  | 0.373(12) | 0.057(19) | 8     | Ob19                                                       | 0.0489(8)   | 0.8088(8)  | 0.2081(17) | 0.627(12) | 0.082(10) | 8     |
| O31                                                  | 0.9776(16)  | 0.6125(16) | 0.143(4)    | 0.373(12) | 0.057(19) | 8     | Ob20                                                       | 0.5225(11)  | 0.5        | 0.1908(17) | 0.627(12) | 0.082(10) | 4     |
| O21                                                  | 0.9187(5)   | 0.7786(13) | 0.0989(14)  | 0.373(12) | 0.057(19) | 8     | Ob21                                                       | 0.9411(8)   | 0.8611(14) | 0.1493(16) | 0.627(12) | 0.082(10) | 8     |
| O22                                                  | 0           | 0.740(5)   | 0           | 0.315(10) | 0.057(19) | 4     | Ob22                                                       | 0           | 0.8904(33) | 0          | 0.627(12) | 0.082(10) | 4     |

## Bond lengths and distances in refined substructure 2

Table S3

| LiCl intruded sample |             |                 |             | Water intruded sample |             |                 |             |
|----------------------|-------------|-----------------|-------------|-----------------------|-------------|-----------------|-------------|
| Vector               | Length/Å    | Angle           | Degrees/°   | Vector                | Length/Å    | Angle           | Degrees/°   |
| Sib3_Ob1             | 1.62982(20) | Ob1_Sib3_Ob2    | 103.788(8)  | Sib3_Ob1              | 1.62895(19) | Ob1_Sib3_Ob2    | 102.479(10) |
| Sib3_Ob2             | 1.63218(30) | Ob1_Sib3_Ob3    | 106.050(4)  | Sib3_Ob2              | 1.63126(29) | Ob1_Sib3_Ob3    | 107.473(4)  |
| Sib3_Ob3             | 1.63095(20) | Ob1_Sib3_Ob4    | 109.552(2)  | Sib3_Ob3              | 1.61803(20) | Ob1_Sib3_Ob4    | 110.508(4)  |
| Sib3_Ob4             | 1.6326(4)   | Ob2_Sib3_Ob3    | 118.067(11) | Sib3_Ob4              | 1.6403(4)   | Ob2_Sib3_Ob3    | 119.586(11) |
|                      |             | Ob2_Sib3_Ob4    | 112.967(16) |                       |             | Ob2_Sib3_Ob4    | 112.640(15) |
|                      |             | Ob3_Sib3_Ob4    | 110.305(15) |                       |             | Ob3_Sib3_Ob4    | 109.173(15) |
| Sib4_Ob3             | 1.64575(18) | Ob3_Sib4_Ob5    | 114.181(2)  | Sib4_Ob3              | 1.64473(19) | Ob3_Sib4_Ob5    | 111.438(3)  |
| Sib4_Ob5             | 1.63735(20) | Ob3_Sib4_Ob6    | 110.109(14) | Sib4_Ob5              | 1.64717(19) | Ob3_Sib4_Ob6    | 110.897(14) |
| Sib4_Ob6             | 1.6498(4)   | Ob3_Sib4_Ob7    | 105.424(13) | Sib4_Ob6              | 1.6594(4)   | Ob3_Sib4_Ob7    | 102.904(13) |
| Sib4_Ob7             | 1.64923(33) | Ob5_Sib4_Ob6    | 109.578(5)  | Sib4_Ob7              | 1.65799(30) | Ob5_Sib4_Ob6    | 111.046(6)  |
|                      |             | Ob5_Sib4_Ob7    | 106.785(10) |                       |             | Ob5_Sib4_Ob7    | 109.450(12) |
|                      |             | Ob6_Sib4_Ob7    | 110.634(16) |                       |             | Ob6_Sib4_Ob7    | 110.830(15) |
| Sib5_Ob4             | 1.62025(32) | Ob4_Sib5_Ob81   | 107.902(15) | Sib5_Ob4              | 1.63894(30) | Ob4_Sib5_Ob81   | 104.065(16) |
| Sib5_Ob81            | 1.72617(33) | Ob4_Sib5_Ob9    | 111.455(12) | Sib5_Ob81             | 1.7855(4)   | Ob4_Sib5_Ob9    | 110.985(11) |
| Sib5_Ob9             | 1.61161(19) | Ob4_Sib5_Ob10   | 114.720(13) | Sib5_Ob9              | 1.61516(19) | Ob4_Sib5_Ob10   | 111.439(12) |
| Sib5_Ob10            | 1.61878(26) | Ob81_Sib5_Ob9   | 107.560(3)  | Sib5_Ob10             | 1.62781(19) | Ob81_Sib5_Ob9   | 104.253(5)  |
|                      |             | Ob81_Sib5_Ob10  | 107.576(16) |                       |             | Ob81_Sib5_Ob10  | 111.957(15) |
|                      |             | Ob9_Sib5_Ob10   | 107.347(3)  |                       |             | Ob9_Sib5_Ob10   | 113.525(2)  |
| Sib6_Ob2             | 1.62699(19) | Ob2_Sib6_Ob82   | 102.952(7)  | Sib6_Ob2              | 1.62637(19) | Ob2_Sib6_Ob31   | 104.493(8)  |
| Sib6_Ob82            | 1.63096(17) | Ob2_Sib6_Ob11   | 106.760(11) | Sib6_Ob31             | 1.63104(18) | Ob2_Sib6_Ob11   | 102.737(14) |
| Sib6_Ob11            | 1.62770(30) | Ob2_Sib6_Ob21   | 113.330(5)  | Sib6_Ob11             | 1.62655(29) | Ob2_Sib6_Ob21   | 113.982(9)  |
| Sib6_Ob21            | 1.6267(4)   | Ob82_Sib6_Ob11  | 115.870(11) | Sib6_Ob21             | 1.6226(4)   | Ob31_Sib6_Ob11  | 115.758(11) |
|                      |             | Ob82_Sib6_Ob21  | 111.186(14) |                       |             | Ob31_Sib6_Ob21  | 109.936(14) |
|                      |             | Ob11_Sib6_Ob21  | 106.826(16) |                       |             | Ob11_Sib6_Ob21  | 109.803(14) |
| Sib7_Ob7             | 1.62585(21) | Ob7_Sib7_Ob10   | 109.603(9)  | Sib7_Ob7              | 1.62505(19) | Ob7_Sib7_Ob10   | 102.764(11) |
| Sib7_Ob10            | 1.62833(18) | Ob7_Sib7_Ob13   | 109.290(8)  | Sib7_Ob10             | 1.64763(26) | Ob7_Sib7_Ob13   | 111.409(6)  |
| Sib7_Ob13            | 1.62188(18) | Ob7_Sib7_Ob19   | 112.578(15) | Sib7_Ob13             | 1.63106(18) | Ob7_Sib7_Ob19   | 114.639(15) |
| Sib7_Ob19            | 1.6296(5)   | Ob10_Sib7_Ob13  | 108.301(12) | Sib7_Ob19             | 1.6377(4)   | Ob10_Sib7_Ob13  | 103.214(14) |
|                      |             | Ob10_Sib7_Ob19  | 109.466(12) |                       |             | Ob10_Sib7_Ob19  | 113.810(11) |
|                      |             | Ob13_Sib7_Ob19  | 107.494(9)  |                       |             | Ob13_Sib7_Ob19  | 100.334(9)  |
| Sib8_Ob9             | 1.63497(19) | Ob9_Sib8_Ob9    | 106.838(14) | Sib8_Ob9              | 1.63869(19) | Ob9_Sib8_Ob9    | 110.099(15) |
| Sib8_Ob9             | 1.63497(19) | Ob9_Sib8_Ob14   | 105.943(10) | Sib8_Ob9              | 1.63869(19) | Ob9_Sib8_Ob14   | 109.302(10) |
| Sib8_Ob14            | 1.6331(4)   | Ob9_Sib8_Ob15   | 112.707(8)  | Sib8_Ob14             | 1.6343(4)   | Ob9_Sib8_Ob15   | 107.410(8)  |
| Sib8_Ob15            | 1.63666(19) | Ob9_Sib8_Ob14   | 105.943(10) | Sib8_Ob15             | 1.62916(19) | Ob9_Sib8_Ob14   | 109.302(10) |
|                      |             | Ob9_Sib8_Ob15   | 112.707(8)  |                       |             | Ob9_Sib8_Ob15   | 107.410(8)  |
|                      |             | Ob14_Sib8_Ob15  | 112.184(16) |                       |             | Ob14_Sib8_Ob15  | 113.274(15) |
| Sib9_Ob1             | 1.62639(21) | Ob1_Sib9_Ob1    | 104.725(16) | Sib9_Ob1              | 1.62377(21) | Ob1_Sib9_Ob1    | 105.398(17) |
| Sib9_Ob1             | 1.62639(21) | Ob1_Sib9_Ob16   | 111.899(9)  | Sib9_Ob1              | 1.62377(21) | Ob1_Sib9_Ob16   | 111.570(10) |
| Sib9_Ob16            | 1.63002(23) | Ob1_Sib9_Ob17   | 106.965(11) | Sib9_Ob16             | 1.62174(27) | Ob1_Sib9_Ob17   | 107.684(11) |
| Sib9_Ob17            | 1.6261(4)   | Ob1_Sib9_Ob16   | 111.899(9)  | Sib9_Ob17             | 1.62728(32) | Ob1_Sib9_Ob16   | 111.570(10) |
|                      |             | Ob1_Sib9_Ob17   | 106.965(11) |                       |             | Ob1_Sib9_Ob17   | 107.685(11) |
|                      |             | Ob16_Sib9_Ob17  | 113.811(16) |                       |             | Ob16_Sib9_Ob17  | 112.568(16) |
| Sib10_Ob13           | 1.62562(21) | Ob13_Sib10_Ob13 | 109.407(17) | Sib10_Ob13            | 1.61406(20) | Ob13_Sib10_Ob13 | 110.879(17) |
| Sib10_Ob13           | 1.62562(21) | Ob13_Sib10_Ob17 | 107.019(10) | Sib10_Ob13            | 1.61406(20) | Ob13_Sib10_Ob17 | 108.939(10) |
| Sib10_Ob17           | 1.62722(28) | Ob13_Sib10_Ob18 | 109.358(10) | Sib10_Ob17            | 1.62068(30) | Ob13_Sib10_Ob18 | 107.679(10) |
| Sib10_Ob18           | 1.62447(30) | Ob13_Sib10_Ob17 | 107.019(10) | Sib10_Ob18            | 1.61832(29) | Ob13_Sib10_Ob17 | 108.939(10) |
|                      |             | Ob13_Sib10_Ob18 | 109.358(10) |                       |             | Ob13_Sib10_Ob18 | 107.679(10) |
|                      |             | Ob17_Sib10_Ob18 | 114.560(16) |                       |             | Ob17_Sib10_Ob18 | 112.733(16) |
| Sib11_Ob5            | 1.63828(19) | Ob5_Sib11_Ob5   | 110.176(15) | Sib11_Ob5             | 1.63809(19) | Ob5_Sib11_Ob5   | 113.459(15) |
| Sib11_Ob5            | 1.63827(19) | Ob5_Sib11_Ob15  | 112.011(8)  | Sib11_Ob5             | 1.63809(19) | Ob5_Sib11_Ob15  | 111.421(8)  |
| Sib11_Ob15           | 1.64113(19) | Ob5_Sib11_Ob18  | 105.475(10) | Sib11_Ob15            | 1.63675(20) | Ob5_Sib11_Ob18  | 106.297(10) |
| Sib11_Ob18           | 1.6397(4)   | Ob5_Sib11_Ob15  | 112.011(8)  | Sib11_Ob18            | 1.6334(4)   | Ob5_Sib11_Ob15  | 111.421(8)  |
|                      |             | Ob5_Sib11_Ob18  | 105.475(10) |                       |             | Ob5_Sib11_Ob18  | 106.297(10) |
|                      |             | Ob15_Sib11_Ob18 | 111.303(16) |                       |             | Ob15_Sib11_Ob18 | 107.496(17) |
| Sib12_Ob11           | 1.62809(19) | Ob11_Sib12_Ob11 | 110.350(15) | Sib12_Ob11            | 1.63121(19) | Ob11_Sib12_Ob11 | 106.820(15) |
| Sib12_Ob11           | 1.62809(19) | Ob11_Sib12_Ob14 | 108.389(8)  | Sib12_Ob11            | 1.63121(19) | Ob11_Sib12_Ob14 | 111.302(8)  |
| Sib12_Ob14           | 1.63200(19) | Ob11_Sib12_Ob16 | 107.492(10) | Sib12_Ob14            | 1.63740(19) | Ob11_Sib12_Ob16 | 108.768(11) |
| Sib12_Ob16           | 1.6327(4)   | Ob11_Sib12_Ob14 | 108.389(8)  | Sib12_Ob16            | 1.6356(4)   | Ob11_Sib12_Ob14 | 111.302(8)  |
|                      |             | Ob11_Sib12_Ob16 | 107.492(10) |                       |             | Ob11_Sib12_Ob16 | 108.768(11) |
|                      |             | Ob14_Sib12_Ob16 | 114.710(16) |                       |             | Ob14_Sib12_Ob16 | 109.784(16) |
| Sib13_Ob19           | 1.64368(24) | Ob19_Sib13_Ob20 | 111.960(13) | Sib13_Ob19            | 1.65668(28) | Ob19_Sib13_Ob20 | 117.142(11) |
| Sib13_Ob20           | 1.64080(18) | Ob19_Sib13_Ob21 | 104.119(15) | Sib13_Ob20            | 1.65969(19) | Ob19_Sib13_Ob21 | 105.381(16) |
| Sib13_Ob21           | 1.6414(4)   | Ob19_Sib13_Ob22 | 109.451(11) | Sib13_Ob21            | 1.6602(4)   | Ob19_Sib13_Ob22 | 110.064(12) |
| Sib13_Ob22           | 1.64468(20) | Ob20_Sib13_Ob21 | 110.265(6)  | Sib13_Ob22            | 1.63936(21) | Ob20_Sib13_Ob21 | 110.963(7)  |
|                      |             | Ob20_Sib13_Ob22 | 109.995(5)  |                       |             | Ob20_Sib13_Ob22 | 108.247(3)  |
|                      |             | Ob21_Sib13_Ob22 | 110.929(15) |                       |             | Ob21_Sib13_Ob22 | 104.289(15) |

Bond lengths and distances in refined substructure 2 , ctnd.

| LiCl intruded sample |          |                  |             | Water intruded sample |          |                  |             |
|----------------------|----------|------------------|-------------|-----------------------|----------|------------------|-------------|
| Vector               | Length/Å | Angle            | Degrees/°   | Vector                | Length/Å | Angle            | Degrees/°   |
|                      |          | Sib3_Ob1_Sib9    | 132.800(12) |                       |          | Sib3_Ob1_Sib9    | 129.602(13) |
|                      |          | Sib3_Ob2_Sib6    | 129.996(2)  |                       |          | Sib3_Ob2_Sib6    | 143.238(3)  |
|                      |          | Sib3_Ob3_Sib4    | 150.663(5)  |                       |          | Sib3_Ob3_Sib4    | 165.296(2)  |
|                      |          | Sib3_Ob4_Sib5    | 149.573(7)  |                       |          | Sib3_Ob4_Sib5    | 137.036(10) |
|                      |          | Sib4_Ob5_Sib11   | 144.110(9)  |                       |          | Sib4_Ob5_Sib11   | 141.999(10) |
|                      |          | Sib4_Ob6_Sib4    | 180.000(0)  |                       |          | Sib4_Ob6_Sib4    | 180.000(0)  |
|                      |          | Sib4_Ob7_Sib7    | 134.365(11) |                       |          | Sib4_Ob7_Sib7    | 116.674(12) |
|                      |          | Sib5_Ob9_Sib8    | 146.736(5)  |                       |          | Sib5_Ob9_Sib8    | 139.818(7)  |
|                      |          | Sib5_Ob10_Sib7   | 145.385(5)  |                       |          | Sib5_Ob10_Sib7   | 125.126(10) |
|                      |          | Sib6_Ob11_Sib12  | 116.758(8)  |                       |          | Sib6_Ob11_Sib12  | 120.846(8)  |
|                      |          | Sib7_Ob13_Sib10  | 163.294(3)  |                       |          | Sib7_Ob13_Sib10  | 160.706(4)  |
|                      |          | Sib8_Ob14_Sib12  | 110.574(16) |                       |          | Sib8_Ob14_Sib12  | 115.448(15) |
|                      |          | Sib8_Ob15_Sib11  | 174.997(2)  |                       |          | Sib8_Ob15_Sib11  | 173.462(2)  |
|                      |          | Sib9_Ob16_Sib12  | 130.389(13) |                       |          | Sib9_Ob16_Sib12  | 142.333(10) |
|                      |          | Sib9_Ob17_Sib10  | 161.976(5)  |                       |          | Sib9_Ob17_Sib10  | 175.071(1)  |
|                      |          | Sib10_Ob18_Sib11 | 150.869(8)  |                       |          | Sib10_Ob18_Sib11 | 149.172(9)  |
|                      |          | Sib7_Ob19_Sib13  | 137.065(8)  |                       |          | Sib7_Ob19_Sib13  | 145.683(7)  |
|                      |          | Sib13_Ob20_Sib13 | 131.278(10) |                       |          | Sib13_Ob20_Sib13 | 142.757(7)  |
|                      |          | Sib6_Ob21_Sib13  | 166.876(4)  |                       |          | Sib6_Ob21_Sib13  | 149.359(8)  |
|                      |          | Sib13_Ob22_Sib13 | 180.000(0)  |                       |          | Sib13_Ob22_Sib13 | 180.000(0)  |
